# Supplementary material
Source: publisher figshare collection journal article supplement (https://asha.figshare.com/ndownloader/files/34148439)
Supplement: Supplementary file 1 [file 34148439]

### **Supplemental Text S1.** Description of youth justice residences in New Zealand.

In New Zealand there are four child, youth, and family youth justice residences that cater for young people between the ages of 14–17 years who are subject to youth court matters.

The young people are either subject to a supervision with residence order or sentence or they are essentially on a remand status. Those subject to the former can receive an order from the courts of between 3–6 months and must serve at least two thirds of that order in residence. The length of a remand stay fluctuates based on a number of factors, including community placement options and the nature of the charges a young person is facing. Often those young people who serve a supervision with residence order have already spent a period of time in residence on remand.

The charges young people in residence face vary significantly. For instance, a young person may be remanded for a short period of time for breaching the conditions of his community-based youth court order, while more appropriate conditions or options are considered. At the other end of the spectrum, he may be remanded facing purely indictable charges. A supervision with residence order is the highest order a youth court judge can impose. Young people may, however, have their matters transferred to the jurisdiction of the District of High Courts, depending on their charges, but can remain on remand in residence until sentencing.

At the residence, young people attend an onsite school and are assessed by a full-time medical team. The residence is also serviced by a youth forensic team, addressing significant mental health needs, and there is also provision for alcohol and other drug counselling.
